# Supplementary material for: Multi-omics revealed the mechanisms of AgNP-priming enhanced rice salinity tolerance
Source: Royal Society of Chemistry journal article supplement (doi:10.1039/d4en00685b), 2024-10-25
Supplement: d4en00685b1.pdf [file d4en00685b1.pdf]

*Supporting Information for*

## **Multi-omics Revealed the Mechanisms of AgNPs- Priming Enhanced Rice Salinity Tolerance**

Si Chen<sup>1‡</sup>, Zhengyan Pan<sup>2‡</sup>, Jose R. Peralta-Videa<sup>3</sup>, Lijuan Zhao<sup>1\*</sup>

<sup>1</sup>State Key Laboratory of Pollution Control and Resource Reuse, School of  
Environment, Nanjing University, Nanjing 210023, China

<sup>2</sup> Institute of Plant Protection, Liaoning Academy of Agricultural Sciences, Shenyang  
110101, China

<sup>3</sup>Department of Chemistry and Biochemistry, The University of Texas at El Paso, 500  
West University Avenue, El Paso, TX 79968, United States

‡Si Chen and Zhengyan Pan contribute equally to this work

\* *Corresponding authors.* Email: [ljzhao@nju.edu.cn](mailto:ljzhao@nju.edu.cn)

| <b>Supporting Information Contents</b>                                                                            | <b>Page</b> |
|-------------------------------------------------------------------------------------------------------------------|-------------|
| <b>Table S1.</b> The physiochemical characteristics of soil (mg/kg dry soil)                                      | S3          |
| <b>Figure S1.</b> Significantly changed sugars and sugar alcohols metabolites in rice leaves after AgNPs priming. | S4          |
| <b>Figure S2.</b> Significantly changed organic acids metabolites in rice leaves after AgNPs priming.             | S5          |
| <b>Figure S3.</b> Significantly changed amines, amino acids metabolites in rice leaves after AgNPs priming.       | S6          |
| <b>Figure S4.</b> Enriched KEGG pathways for metabolites in rice leaves induced by AgNPs priming.                 | S7          |

**Table S1. The physiochemical characteristics of soil (mg/kg dry soil)**

|              |                                 |                                 |            |             |
|--------------|---------------------------------|---------------------------------|------------|-------------|
| pH           | NO <sub>3</sub> <sup>-</sup> -N | NH <sub>4</sub> <sup>+</sup> -N | SOM        |             |
| 7.07         | 29.7                            | 10.3                            | 20.8       |             |
| Al           | Fe                              | Ca                              | K          | Mg          |
| 21663 ± 1014 | 15407 ± 973                     | 4291 ± 264                      | 3879 ± 164 | 3365 ± 189  |
| Mn           | Na                              | Zn                              | Cu         | Mo          |
| 276 ± 31     | 166 ± 16                        | 26.4 ± 2.7                      | 16.1 ± 1.5 | 0.19 ± 0.02 |

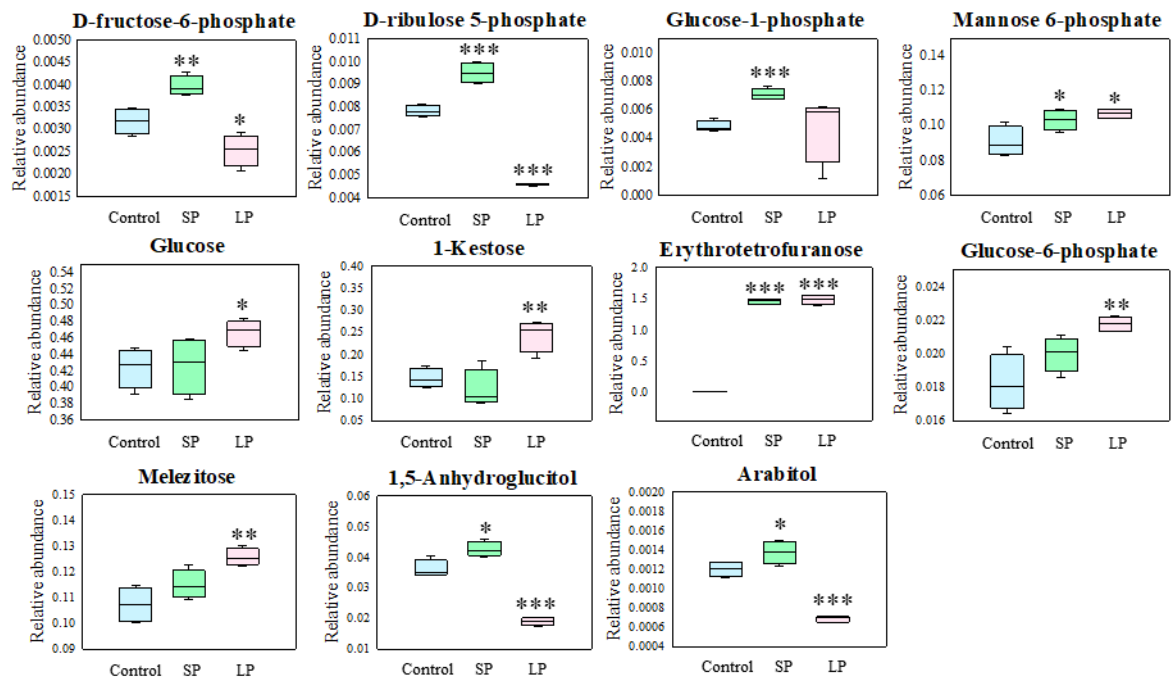

**Figure S1.** Significantly changed sugars and sugar alcohols metabolites in rice leaves after AgNPs priming.

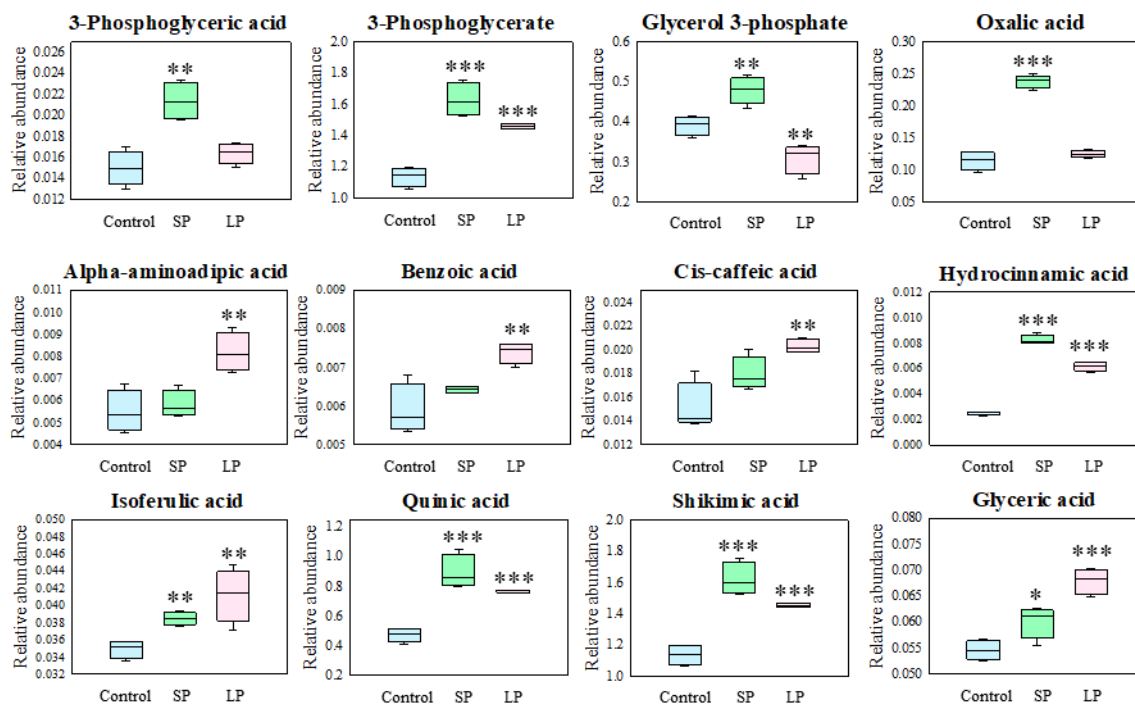

**Figure S2.** Significantly changed organic acids metabolites in rice leaves after AgNPs priming.

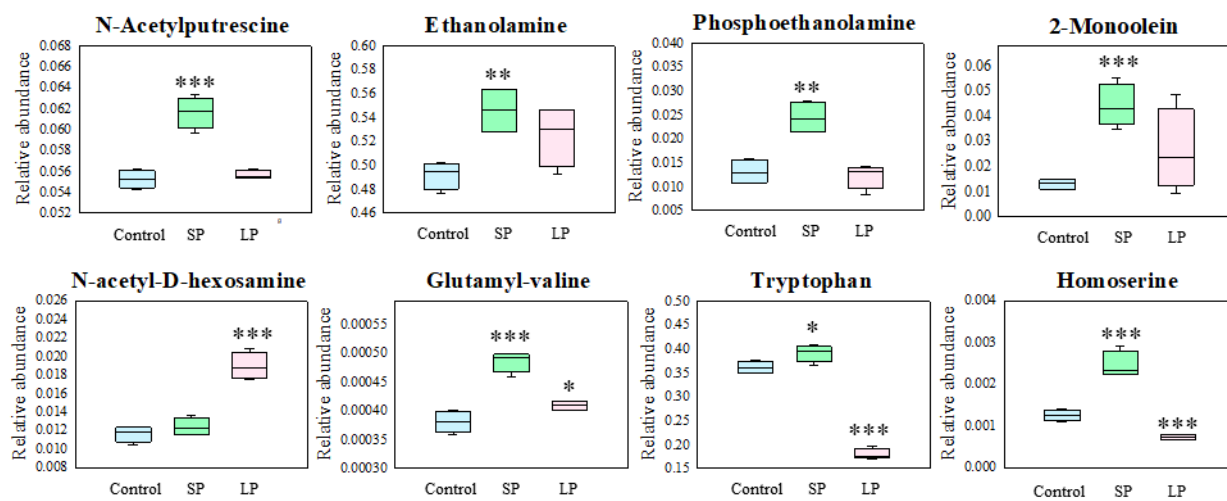

**Figure S3.** Significantly changed amines, amino acids metabolites in rice leaves after AgNPs priming.

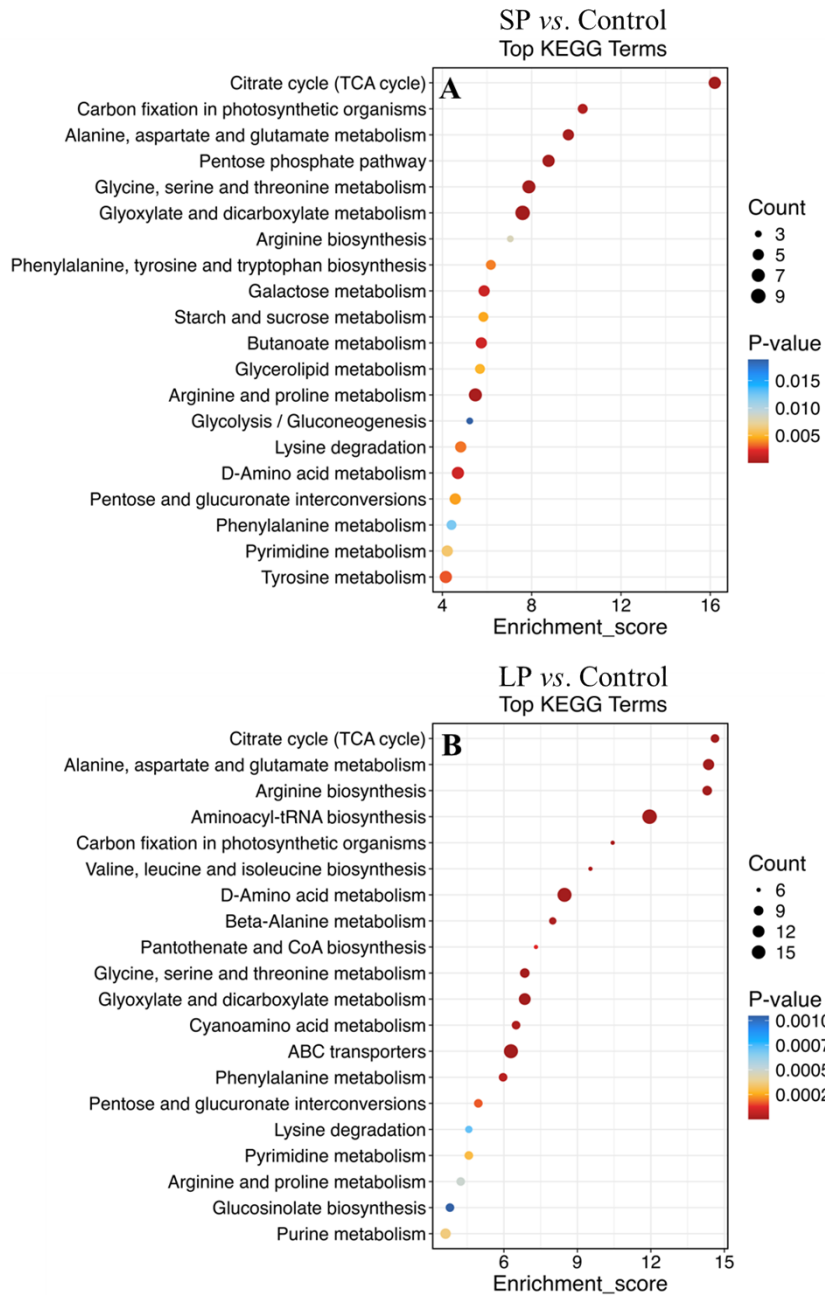

**Figure S4.** Enriched KEGG pathways for metabolites in rice leaves induced by AgNPs priming.
